# Supplementary material for: One-Step Photochemical Immobilization of Aptamer on Graphene for Label-Free Detection of NT-proBNP
Source: MDPI journal article supplement (doi:10.3390/bios12121071), 2022-11-23
Supplement: s1 [file s1]

# One-Step Photochemical Immobilization of Aptamer on Graphene for Label-Free Detection of NT-proBNP

Nikita Nekrasov <sup>1</sup>, Anastasiia Kudriavtseva <sup>1</sup>, Alexey V. Orlov <sup>2</sup>, Ivana Gadjanski <sup>3</sup>, Petr I. Nikitin <sup>2,\*</sup>, Ivan Bobrinetskiy <sup>1,3</sup> and Nikola Ž. Knežević <sup>3,\*</sup>

<sup>1</sup> Center for Probe Microscopy and Nanotechnology, National Research University of Electronic Technology, Moscow, 124498 Zelenograd, Russia

<sup>2</sup> Prokhorov General Physics Institute of the Russian Academy of Sciences, 119991 Moscow, Russia

<sup>3</sup> BioSense Institute—Research and Development Institute for Information Technologies in Biosystems, University of Novi Sad, 21000 Novi Sad, Serbia

\* Correspondence: petr.nikitin@nsc.gpi.ru (P.I.N.); nknezevic@biosense.rs (N.Ž.K.)

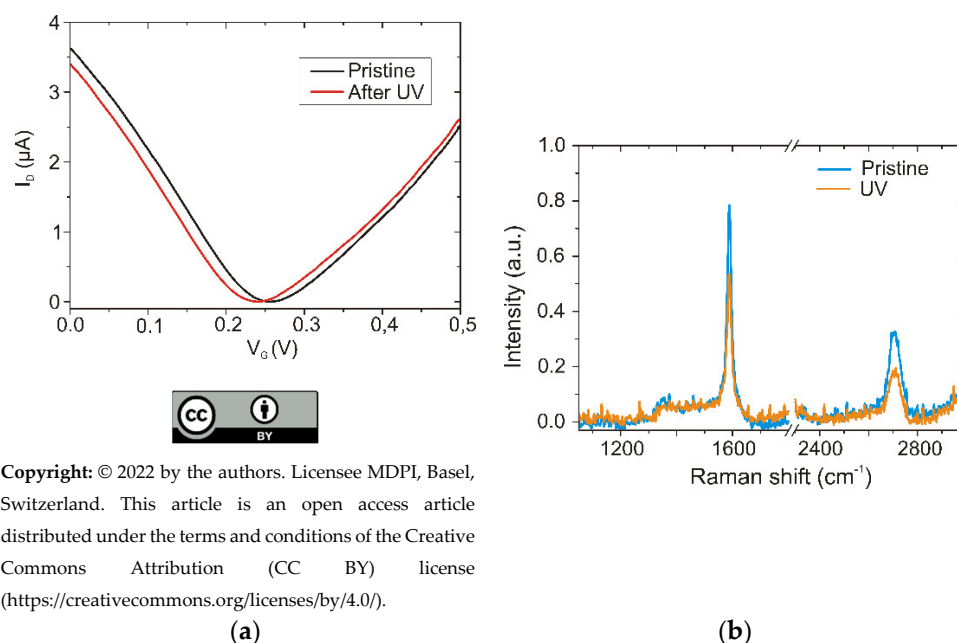

**Copyright:** © 2022 by the authors. Licensee MDPI, Basel, Switzerland. This article is an open access article distributed under the terms and conditions of the Creative Commons Attribution (CC BY) license (<https://creativecommons.org/licenses/by/4.0/>).

**Figure S1.** Control GFET after UV irradiation in pure PBS. Change in CVCs for GFET after 10 min of UV irradiation in PBS solution **(a)**. Dirac point shifts at 17 mV. Raman spectra of graphene before and after UV processing in PBS **(b)**.

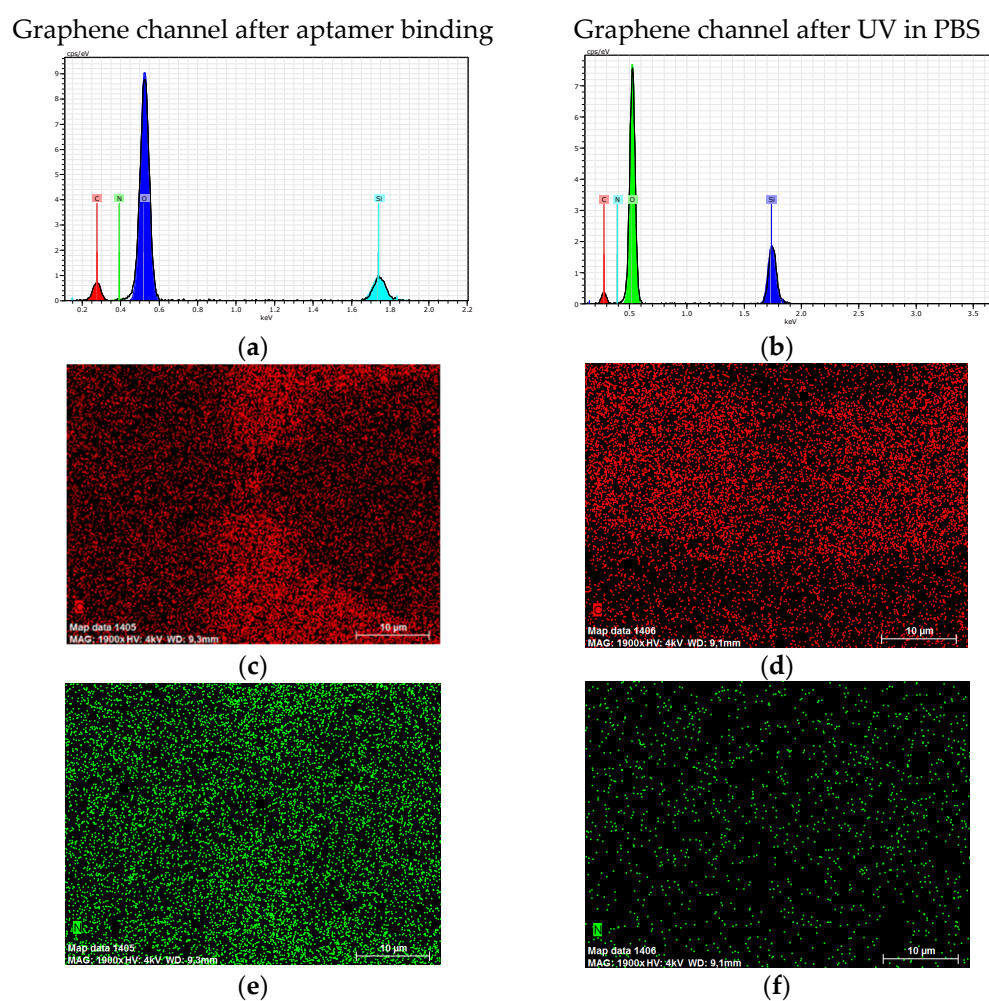

**Figure S2.** Energy dispersive spectroscopy characterization of modified graphene channels. Results of graphene surfaces after azide aptamer binding (left column) and after 5 min UV treatment without aptamer (right column). Red (c, d) and green (e, f) dots represent the parts covered with a carbon and nitrogen element, respectively. Scale bar: 10  $\mu\text{m}$ .

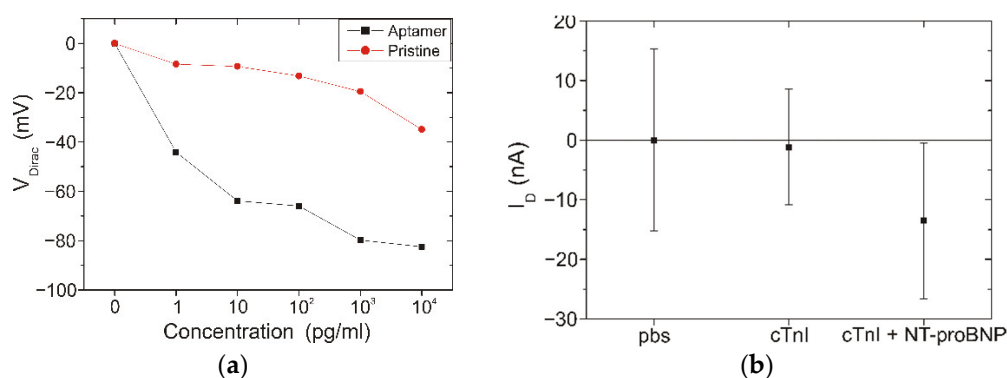

**Figure S3.** Control experiments on selectivity and specificity. (a) Dirac point shift for pristine (after 10 min UV treatment) and aptamer-modified graphene channels for increasing NT-proBNP concentrations. (b)  $\Delta I_D$  for pure PBS, cTnI (3.5 ng/ml) and mix of 3.2 ng/ml cTnI + 1 ng/ml NT-proBNP for N20a aptamer-modified GET at a fixed gate voltage  $V_G = 250$  mV. The current values were treated to start at zero using the equation  $\Delta I_D = I_D - \text{minimum}(I_D)$ .

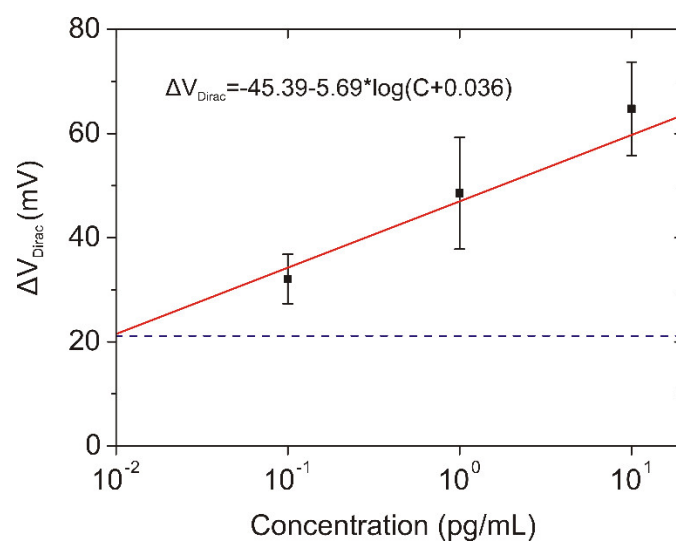

**Figure S4.** Calculation of LOD for GFET sensor, modified by azide-aptamer. Based on data at Figure 3b. The LOD was calculated as intersection of data from linear range and 3 times multiplied noise level of GFET.
